# Supplementary material for: Impact of Slim Linear Echoendoscope on the Practice of EUS
Source: PubMed Central journal article supplement — J Clin Gastroenterol. 2023 Nov 21;58(8):830–5. doi: 10.1097/MCG.0000000000001938 (PMC11305618; doi:10.1097/mcg.0000000000001938), 2023-11-21
Supplement: mcg-58-830-s001.pdf [file mcg-58-830-s001.pdf]

|             |                                                                                            |                                           |
|-------------|--------------------------------------------------------------------------------------------|-------------------------------------------|
| Title       | Registry of patients undergoing endoscopic ultrasound procedures using the slim endoscopes |                                           |
| Subject ID: | SLIM-____                                                                                  | Principal Investigator: Ji Young Bang, MD |

Date of procedure: \_\_\_\_\_ / \_\_\_\_\_ / \_\_\_\_\_

**Demographics**

Age: \_\_\_\_\_

Gender: Male:  Female:

Race: Caucasian: \_\_\_\_\_ Black: \_\_\_\_\_ Hispanic: \_\_\_\_\_ Asian: \_\_\_\_\_  
Other: \_\_\_\_\_

Status: Inpatient:  Outpatient:

**EUS procedure**

**Procedure indication**

Indication for EUS examination:

- Cancer staging
- Tissue diagnosis
- Cyst evaluation
- Abdominal pain
- Therapeutic procedure:  CPB  CPN  Fiducial placement  Other, state \_\_\_\_\_
- Other, state: \_\_\_\_\_

Reason for using slim linear ultrasound scope:

- Unable to perform or complete EUS examination using standard echoendoscope  
If yes - Linear scope  Radial scope   
Reason for failed exam using standard echoendoscope: \_\_\_\_\_  
\_\_\_\_\_  
\_\_\_\_\_

- If Other reason, details: \_\_\_\_\_  
\_\_\_\_\_  
\_\_\_\_\_

- Dilation performed: Yes  No   
If yes - Dilator used: Savary  CRE balloon   
- Dilation diameter: \_\_\_\_\_ mm

|             |                                                                                            |                                           |
|-------------|--------------------------------------------------------------------------------------------|-------------------------------------------|
| Title       | Registry of patients undergoing endoscopic ultrasound procedures using the slim endoscopes |                                           |
| Subject ID: | SLIM-____                                                                                  | Principal Investigator: Ji Young Bang, MD |

**Procedure details**

Successful EUS examination performed using slim echoendoscope with examination endpoint reached:

Yes       No

Type of procedure performed/attempted: \_\_\_\_\_

\_\_\_\_\_

If failure, state reason for failed slim echoendoscope examination: \_\_\_\_\_

\_\_\_\_\_

Total procedural duration: \_\_\_\_\_ mins

**Final diagnosis on EUS examination**

\_\_\_\_\_

**Intra-procedural adverse events**

**Intraprocedural complication:**       Yes       No

If yes, state:

Aspiration       Bleeding       Cardiovascular       Death

Perforation       Pneumoperitoneum       Respiratory

Other/give details:

\_\_\_\_\_

**Adverse event management (specify):**       Surgery       IR       Medical

Explain treatment measures: \_\_\_\_\_

\_\_\_\_\_

**Post-procedure length of hospital stay for adverse events:** \_\_\_\_\_ days

**Length of stay in ICU for adverse events:** \_\_\_\_\_ days

**Baseline and Procedure Details**

|             |                                                                                            |                                           |
|-------------|--------------------------------------------------------------------------------------------|-------------------------------------------|
| Title       | Registry of patients undergoing endoscopic ultrasound procedures using the slim endoscopes |                                           |
| Subject ID: | SLIM-____                                                                                  | Principal Investigator: Ji Young Bang, MD |

Notes: \_\_\_\_\_  
\_\_\_\_\_  
\_\_\_\_\_  
\_\_\_\_\_  
\_\_\_\_\_  
\_\_\_\_\_  
\_\_\_\_\_  
\_\_\_\_\_

**Supplemental Table 1.** Case capsule of 23 patients who underwent EUS examinations using the slim linear echoendoscope

| No. | Age/<br>Sex | Indication                                                                                                                                                                 | EUS Finding                                                          | Technical<br>Success | Procedure<br>Time<br>(mins) | Procedural Impact                                                                                 |
|-----|-------------|----------------------------------------------------------------------------------------------------------------------------------------------------------------------------|----------------------------------------------------------------------|----------------------|-----------------------------|---------------------------------------------------------------------------------------------------|
| 1   | 80/M        | Obstructive Jaundice in RYGB - inability to advance standard echoendoscope via the afferent limb                                                                           | 1.8cm distal bile duct adenocarcinoma on FNB                         | Yes                  | 15                          | Established diagnosis. Precluded need for CT-guided biopsy or laparotomy                          |
| 2   | 75/M        | Severe abdominal pain with pancreatic duct dilation on CT. Cervical osteophyte precluded standard echoendoscope passage via the oropharynx                                 | 1.6 cm pancreatic neck cancer on FNB                                 | Yes                  | 9                           | Established diagnosis. Precluded need for open laparotomy as mass was not seen on CT              |
| 3   | 73/F        | Pancreatic tail mass on CT. Severe peptic stricture precluded standard echoendoscope passage at distal esophagus.                                                          | 21mm side-branch-IPMN on FNB                                         | Yes                  | 8                           | Established diagnosis. Precluded need for serial imaging/surgery                                  |
| 4   | 81/M        | Mass adjacent to fourth portion of duodenum not accessible by standard echoendoscope                                                                                       | 18 mm metastatic squamous cell cancer from tongue                    | Yes                  | 22                          | Established diagnosis. Precluded need for exploration as there was no window for CT-guided biopsy |
| 5   | 68/M        | Abdominal pain of unclear etiology. Cervical osteophyte precluded standard echoendoscope passage via the oropharynx and EUS was requested to rule out chronic pancreatitis | Normal EUS exam                                                      | Yes                  | 5                           | Excluded chronic pancreatitis as cause of abdominal pain                                          |
| 6   | 75/F        | Stenosis at site of gastric bypass precluded passage of standard echoendoscope via afferent limb                                                                           | 22mm neuroendocrine tumor in pancreatic head                         | Yes                  | 30                          | Established diagnosis and precluded need for CT-guided biopsy                                     |
| 7   | 68/F        | Positive PET uptake in liver. Distal esophageal cancer precluded scope passage to the stomach.                                                                             | 11mm metastatic cancer in the left lobe of liver                     | Yes                  | 18                          | Established diagnosis. Altered treatment plan by precluding need for radiation therapy.           |
| 8   | 80/M        | Obstructive jaundice in a lung cancer patient with tracheostomy that precluded passage of standard echoendoscope                                                           | Embedded stone in the ampulla and not cancer. Patient underwent ERCP | Yes                  | 8                           | Established diagnosis and altered treatment plan                                                  |
| 9   | 66/F        | Gastric outlet obstruction with long segment duodenal stricture. EGD with biopsies were indeterminate. Precluded standard echoendoscope passage                            | Duodenal wall thickening that on FNB was adenocarcinoma              | Yes                  | 30                          | Duodenal cancer. Established diagnosis and altered treatment plan                                 |
| 10  | 77/F        | Obstructive jaundice in RYGB anatomy. Could not advance standard echoendoscope through gastrogastrostomy (LAMS) site                                                       | Biliary IPMN on EUS-FNB of a biliary papillary projection            | Yes                  | 15                          | Biliary IPMN. Conservative care.                                                                  |

|    |      |                                                                                                                                                                                                                                              |                                                                                        |     |    |                                                                                |
|----|------|----------------------------------------------------------------------------------------------------------------------------------------------------------------------------------------------------------------------------------------------|----------------------------------------------------------------------------------------|-----|----|--------------------------------------------------------------------------------|
| 11 | 76/F | Peri-hepatic PET positive mass on CT imaging in distal esophageal squamous cell cancer that precluded standard echoendoscope                                                                                                                 | 14mm perihepatic lymph node that was biopsy proven on EUS-FNB to be metastasis         | Yes | 32 | Established diagnosis. Precluded need for radiation therapy                    |
| 12 | 56/M | Suspected distal esophageal cancer with negative endoscopic biopsies. Inability to pass standard echoendoscope as stricture was resistant despite dilation. PET positive in esophagus                                                        | Benign esophageal stricture on EUS-FNB and proven at 12-month follow-up                | Yes | 10 | Established diagnosis and altered treatment plan.                              |
| 13 | 79/M | Distal esophageal obstruction resistant to dilation using Savary. CT imaging revealed thickened stomach with poor expansion and the thickened proximal stomach precluded passage of standard echoendoscope. Prior EGD biopsies x 2 negative. | Linitis plastica (T3N1) on EUS-FNB                                                     | Yes | 12 | Established diagnosis and altered treatment plan                               |
| 14 | 65/M | 18mm liver mass on CT imaging in distal esophageal cancer that precluded standard echoendoscope passage.                                                                                                                                     | Metastatic adenocarcinoma on EUS-FNB using SLE                                         | Yes | 12 | Established diagnosis and altered treatment plan.                              |
| 15 | 79/M | Radiation-induced mid-esophageal stricture in lung cancer that was strongly PET positive. EUS requested for evaluation of underlying malignancy.                                                                                             | No mass evident on EUS and FNB revealed fibrosis. Benign course at 12-month follow-up. | No  | 10 | EUS excluded underlying cancer                                                 |
| 16 | 70/M | Gastric outlet obstruction in laryngeal cancer.                                                                                                                                                                                              | Airway compromise with desaturation on passage of slim echoendoscope                   | No  | 15 | Technical failure. Duodenal cancer diagnosed on long-term follow-up by imaging |
| 17 | 82/F | Dilated CBD with elevated liver tests in eosinophilic esophagitis. MRI was normal.                                                                                                                                                           | CBD stone on EUS                                                                       | Yes | 6  | Established diagnosis and treated by ERCP.                                     |
| 18 | 67/M | Pancreatic head mass on CT. Tear during dilation of eosinophilic esophagitis and inability to pass standard echoendoscope                                                                                                                    | EUS-guided FNB of pancreatic mass revealed cancer                                      | Yes | 10 | Established diagnosis. Precluded need for CT-guided biopsy                     |
| 19 | 74/M | Mid-esophageal stricture, post radiation for squamous cell cancer (2 years). Positive PET uptake. Unable to dilate to facilitate passage of standard echoendoscope                                                                           | EUS-guided FNB of esophagus using slim linear echoendoscope revealed cancer            | Yes | 5  | Established diagnosis (tumor recurrence) and impacted treatment plan.          |
| 20 | 71/F | Obstructive jaundice in RYGB anatomy. Mid bile duct stricture on MRCP. Standard EUS scope could not be passed via LAMS.                                                                                                                      | Cholangiocarcinoma on slim EUS examination                                             | Yes | 15 | Established diagnosis and impacted treatment plan                              |

|    |      |                                                                                                                                            |                                                                             |     |    |                                                  |
|----|------|--------------------------------------------------------------------------------------------------------------------------------------------|-----------------------------------------------------------------------------|-----|----|--------------------------------------------------|
| 21 | 65/M | Gastric cardia mass compressing the distal esophagus and precluded passage of standard echoendoscope. Prior EGD-biopsies x 3 were negative | EUS-FNB of gastric cardia fold revealed cancer                              | Yes | 12 | Established diagnosis and altered treatment plan |
| 22 | 66/F | Gastric outlet obstruction due to duodenal stricture that precluded passage of standard echoendoscope                                      | EUS-FNB of wall layers in duodenum revealed adenocarcinoma of duodenal bulb | Yes | 15 | Established tissue diagnosis                     |
| 23 | 56/M | Gastric outlet obstruction with pancreatic mass; CT biopsy x 4 and surgical biopsy negative                                                | 15 x 10 uncinata mass. Pancreatic cancer                                    | Yes | 40 | Established tissue diagnosis                     |
